# Supplementary material for: Rational Design of Albumin Theranostic Conjugates for Gold Nanoparticles Anticancer Drugs: Where the Seed Meets the Soil?
Source: PubMed Central journal article supplement (PMC7828547; doi:10.3390/biomedicines9010074), 2021-01-13
Supplement: biomedicines-09-00074-s001.pdf [file biomedicines-09-00074-s001.pdf]

# Supporting information

for

## Rational design of albumin theranostic conjugates for gold nanoparticles anticancer drugs: where the seed meets the soil?

Tatyana V. Popova<sup>1</sup>, Inna A. Pyshnaya<sup>1</sup>, Olga D. Zakharova,<sup>1</sup> Andrey E. Akulov<sup>2</sup>, Oleg B. Shevelev<sup>2</sup>, Julia Poletaeva<sup>1</sup>, Evgenii L. Zavjalov<sup>2</sup>, Vladimir N. Silnikov<sup>1</sup>, Elena I. Ryabchikova,<sup>1</sup> and Tatyana S. Godovikova<sup>1</sup>

<sup>1</sup> Institute of Chemical Biology and Fundamental Medicine, The Siberian Branch of the Russian Academy of Sciences, Lavrentiev ave. 8, Novosibirsk, 630090, Russia; io197724@gmail.com (T.V.P.), pyshnaya@niboch.nsc.ru (I.A.P.), garonna3@mail.ru (O.D.Z.), fabaceae@yandex.ru (J.P.), silnik@niboch.nsc.ru (V.S.), lenryab@niboch.nsc.ru (E.R.)

<sup>2</sup> Institute of Cytology and Genetics, SB RAS, Lavrentiev ave. 10, Novosibirsk, 630090, Russia; akulov@bionet.nsc.ru (A.E.A.), shevelev@bionet.nsc.ru (O.B.S.), zavjalov@bionet.nsc.ru (E.Z.)

\* Correspondence: t\_godovikova@mail.ru; Tel.: 8-383-3635183

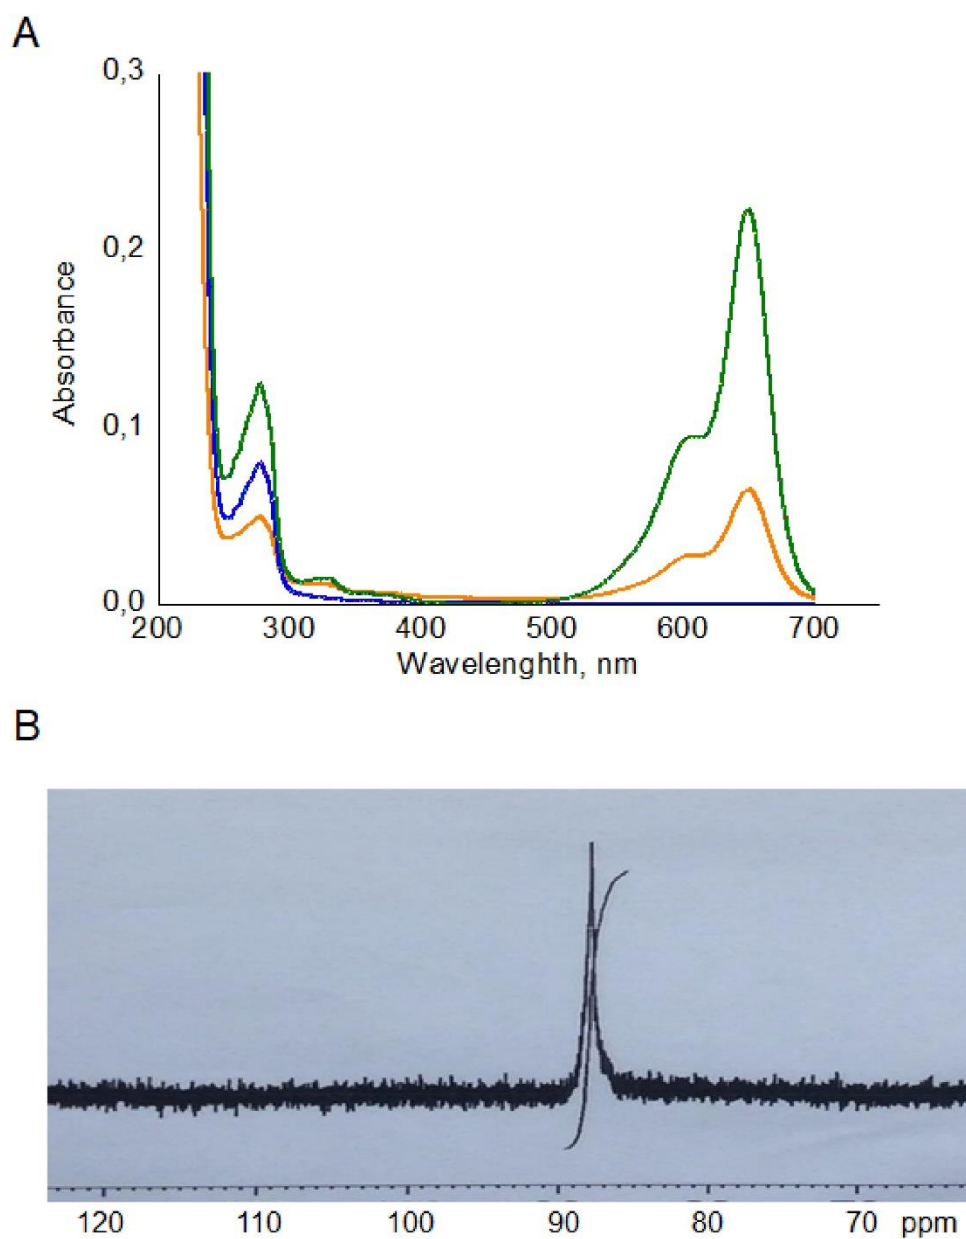

**Figure. S1.** Characterization of multifunctional human serum albumin-therapeutic conjugate HSA-Cy5-HcyTFAc-B<sub>12</sub>H<sub>12</sub>. A: UV-vis spectra of HSA homocystamides in PBS buffer, pH 7.4. HSA – blue; HSA-Cy5-HcyTFAc – green, HSA-Cy5-HcyTFAc-B<sub>12</sub>H<sub>12</sub> – orange. B: <sup>19</sup>F NMR spectrum (at 282.4 MHz) of HSA-Cy5-HcyTFAc-B<sub>12</sub>H<sub>12</sub> conjugate (0.6 mM) in PBS buffer (pH 7.4, to provide deuterium lock, D<sub>2</sub>O was added to 20% of the total volume) at 37°C. The chemical shifts are referred to the resonance of C<sub>6</sub>F<sub>6</sub> at 0.0 ppm.

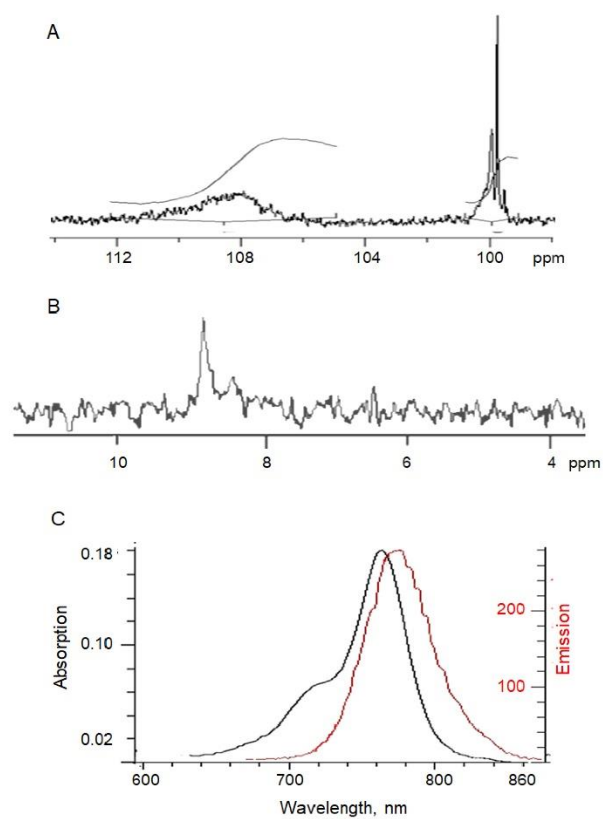

**Figure S2.** Characterization of multifunctional human serum albumin-therapeutic conjugate PFT-Hcy-HSA-Cy7-pTFT. A:  $^{19}\text{F}$  NMR spectrum (at 282.4 MHz) of PFT-Hcy-HSA-Cy7-pTFT conjugate (0.6 mM) in PBS buffer (pH 7.4, to provide deuterium lock,  $\text{D}_2\text{O}$  was added to 20% of the total volume) at 37°C. The chemical shifts are referred to the resonance of  $\text{C}_6\text{F}_6$  at 0.0 ppm. B:  $^{31}\text{P}$  NMR spectrum (at 121 MHz) of PFT-Hcy-HSA-Cy7-pTFT conjugate (0.6 mM) in  $\text{D}_2\text{O}$  at 37°C. C: Absorption (black) and Emission (red) spectra of PFT-Hcy-HSA-Cy7-pTFT (10  $\mu\text{M}$ ) recorded in PBS buffer (pH 7.4) at 37°C.
